# Supplementary material
Source: MDPI journal article supplement (https://www.mdpi.com/2673-4591/37/1/80)
Supplement: s1 [file s1]

# DEVELOPMENT OF PECTIN AND SODIUM ALGINATE COMPOSITE FILMS WITH IMPROVED BARRIER AND MECHANICAL PROPERTIES FOR FOOD PACKAGING APPLICATIONS

**AUTHORS:** ABHAY KANNAN, M DHEEPHTHA, YAMINI SUDHA SISTLA

CHEMICAL ENGINEERING DEPARTMENT,  
SHIV NADAR INSTITUTION OF EMINENCE, INDIA

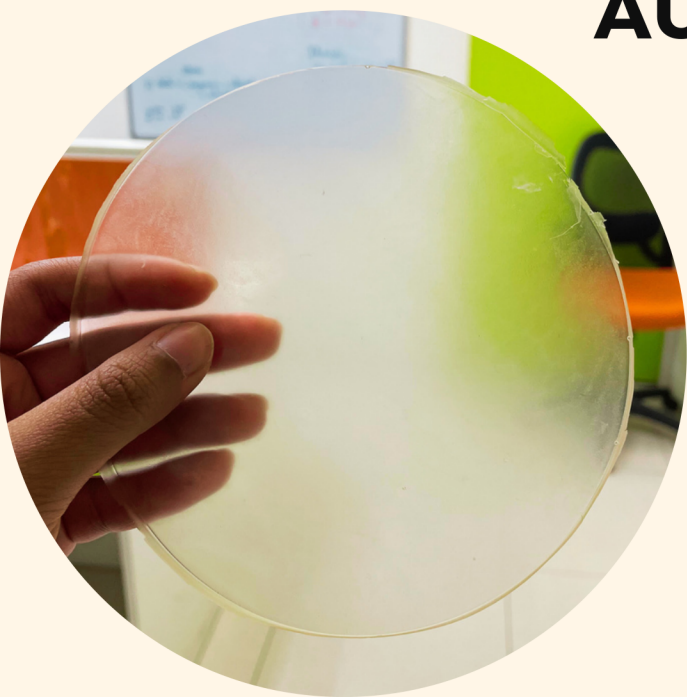

# INTRODUCTION

- Food packaging was predicted to have a global market value of around 363 billion dollars in 2022.
- Global food packaging market it is expected to reach USD 512 Billion by 2028.
- Synthetic Polymers used in packaging currently take years to degrade and digest for human body.
- Various key parameters for the study, such as concentration of plasticizer and stabilizer, pH, stirring time, sonication, temperature and humidity for drying, had an effect on the final output.

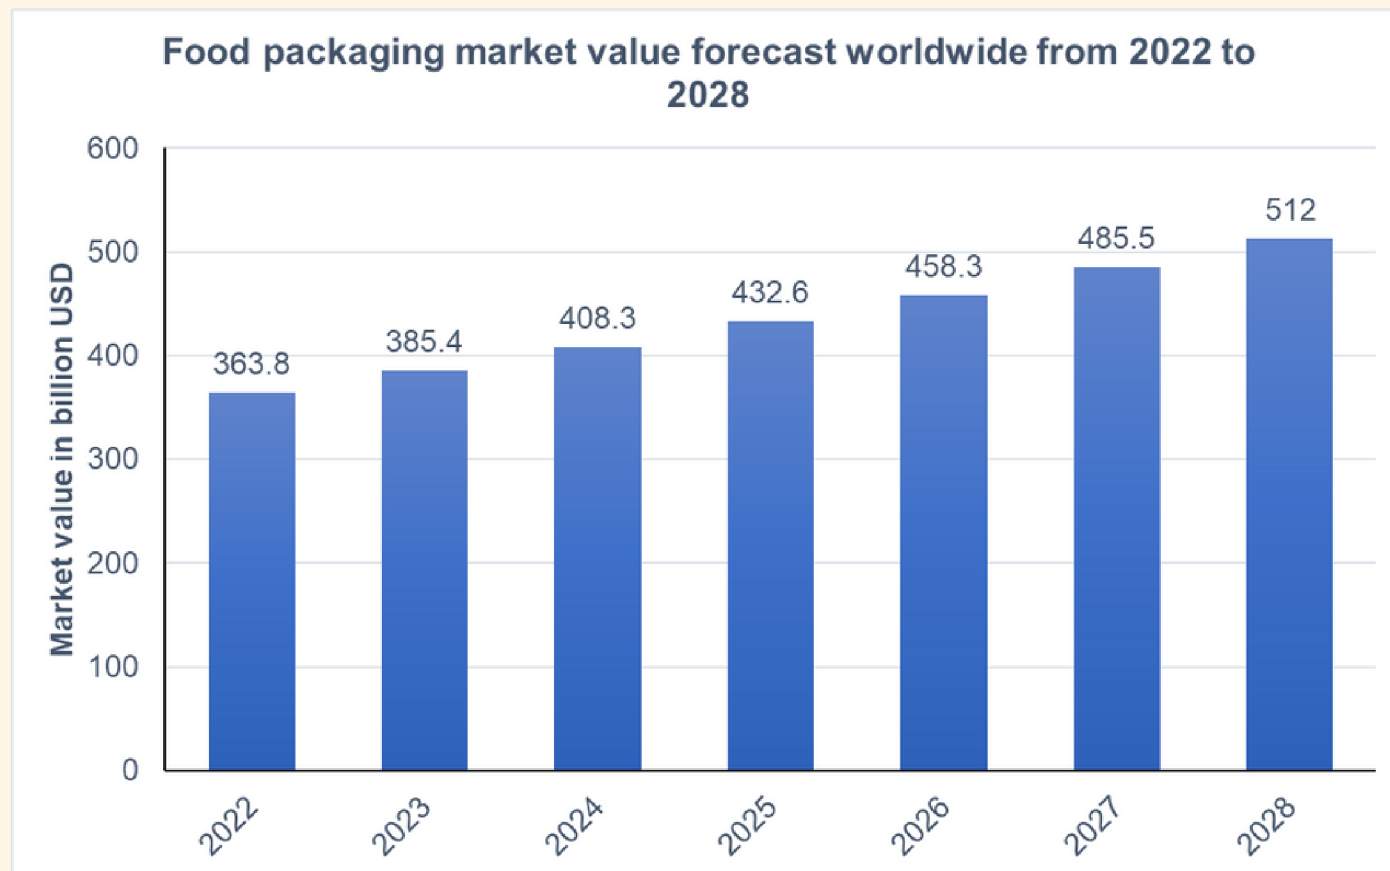

Source: <https://www.statista.com/statistics/876489/food-packaging-market-value-forecast-worldwide/>

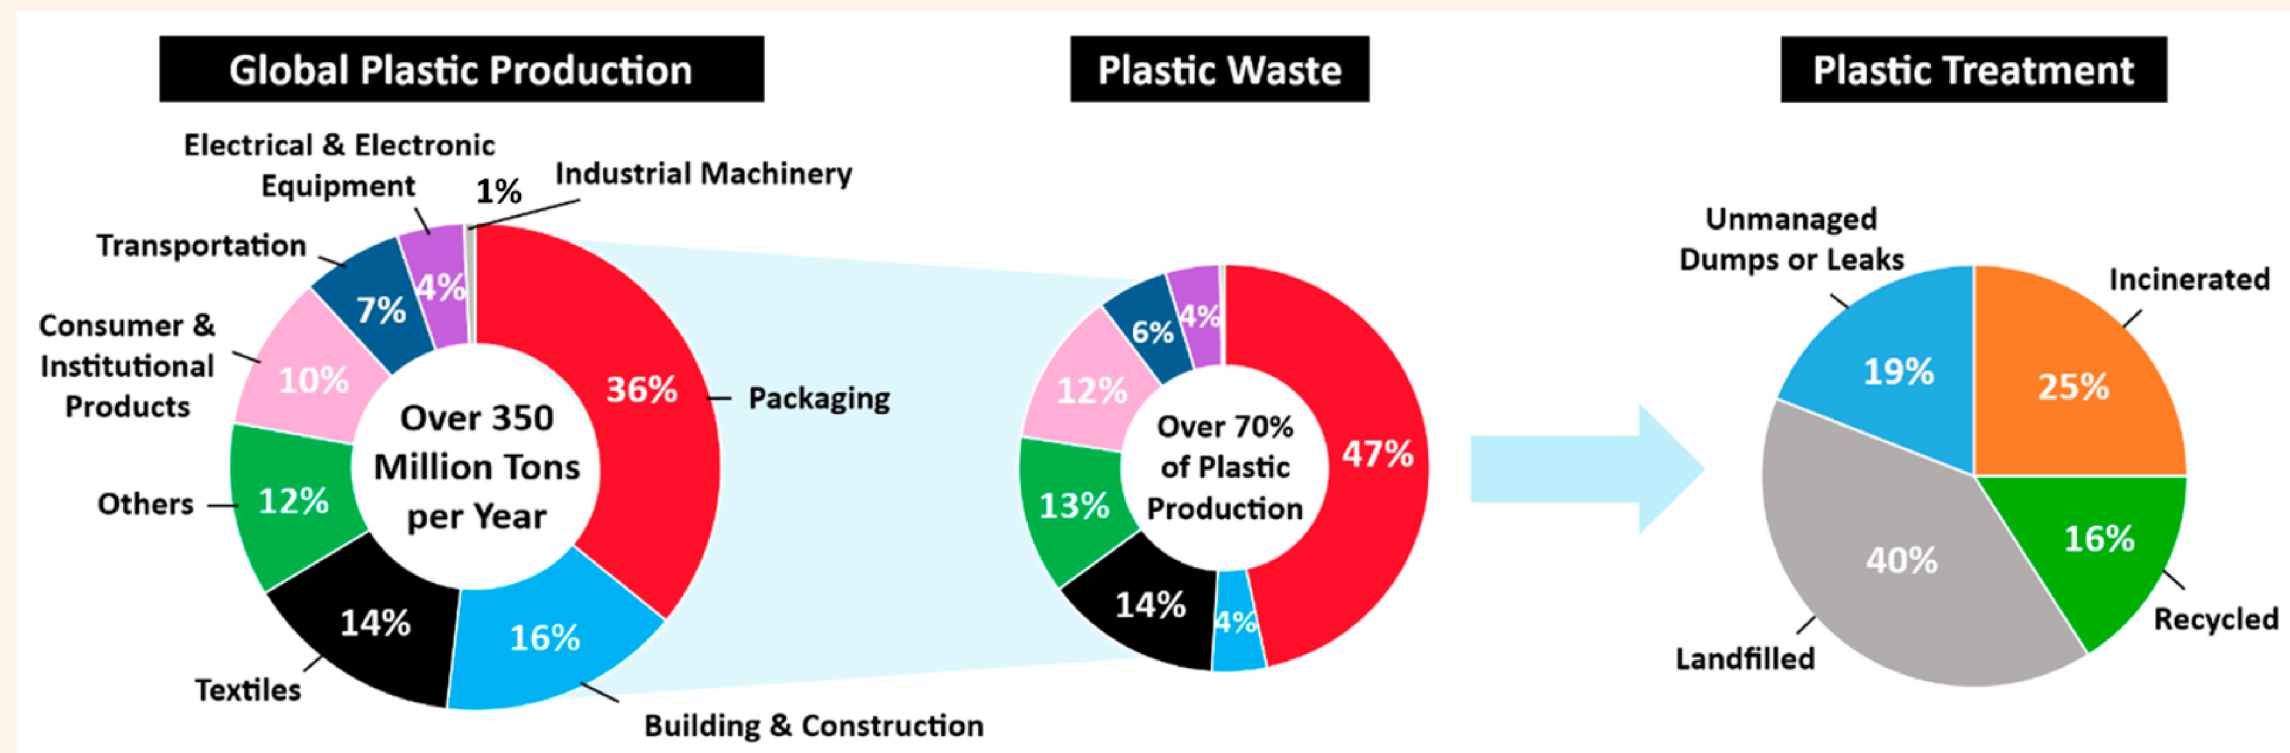

Source: [https://www.mdpi.com/bioengineering/bioengineering-09-00098/article\\_deploy/html/images/bioengineering-09-00098-g001-550.jpg](https://www.mdpi.com/bioengineering/bioengineering-09-00098/article_deploy/html/images/bioengineering-09-00098-g001-550.jpg)

# METHOD & DESIGN OF EXPERIMENT



- Components were weighed and dissolved in hot distilled water.
- The solution was stirred, using a magnetic stirrer, at a constant temperature and speed.
- Remaining larger particles were homogenized using a Homogenizer at constant speed.
- The film forming solution was filtered out and homogenized using an Ultra-Sonicator.
- During the process a constant pH of 3-4 was maintained.
- The solution was equally poured into petri dishes and placed in Humidity chamber at a constant temperature of 40°C and 60% relative humidity.
- The films were peeled and placed in pouches in a vacuum desiccator.
- A two-level three-factor ( $2^3$ ) design of experiments was implemented for this research.
- The three factors considered were:
  - (1) Concentration of Sodium Alginate
  - (2) Concentration of Castor Oil
  - (3) Concentration of D-Sorbitol
- High, Medium and Low values were considered for each component.
- The amount of pectin was kept constant (15 gm in 600 mL distilled water).

# DESIGN OF EXPERIMENT

| Run No. | Sodium Alginate (gm) | Castor Oil (gm) | D-Sorbitol (gm) |
|---------|----------------------|-----------------|-----------------|
| 1       | 7.5 (High)           | 2.25 (High)     | 4.5 (High)      |
| 2       | 3.75 (Low)           | 2.25            | 4.5             |
| 3       | 7.5                  | 1.5 (Low)       | 4.5             |
| 4       | 3.75                 | 1.5             | 4.5             |
| 5       | 7.5                  | 2.25            | 2.25 (Low)      |
| 6       | 3.75                 | 2.25            | 2.25            |
| 7       | 7.5                  | 1.5             | 2.25            |
| 8       | 3.75                 | 1.5             | 2.25            |
| 9       | 5.625 (Medium)       | 1.875 (Medium)  | 3.375 (Medium)  |



# RESULTS & DISCUSSION

## Thickness

All films were thin, with an average thickness of  $0.11 \pm 0.004$  mm. These were measured using a micrometer.

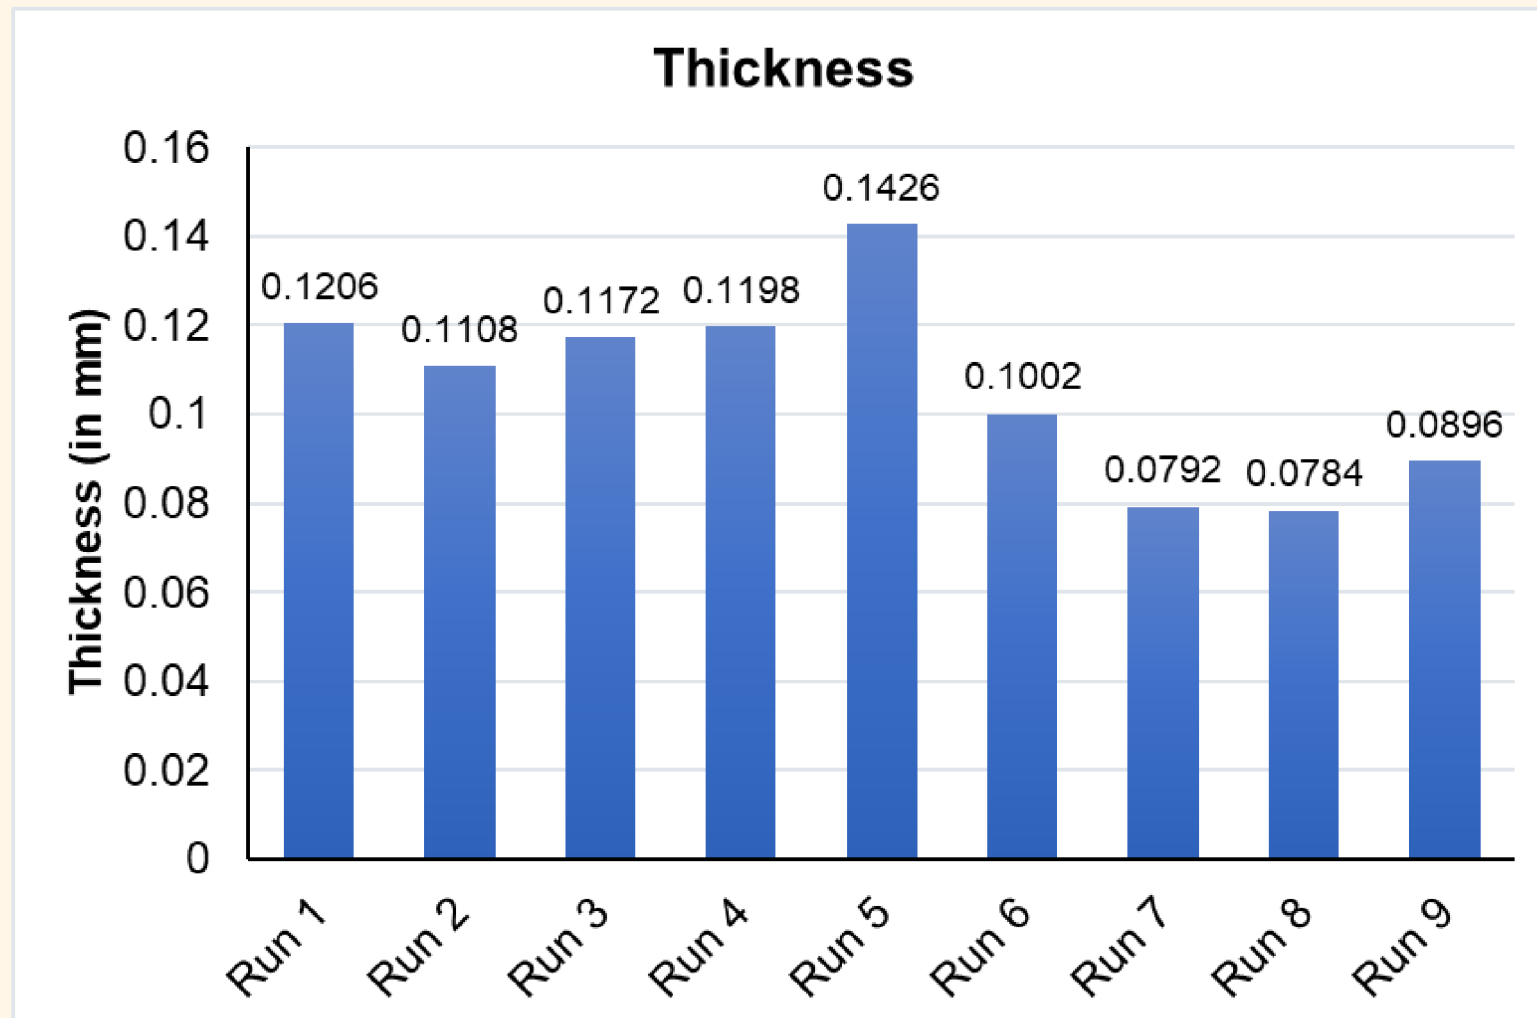

## Transparency

All films prepared were transparent with the total colour difference or transparency parameter ( $\Delta E$ ) in the range of 3 to 11.

$\Delta E$  was calculated using the given formula:

$$\Delta E = \sqrt{(L^* - L)^2 + (a^* - a)^2 + (b^* - b)^2}$$

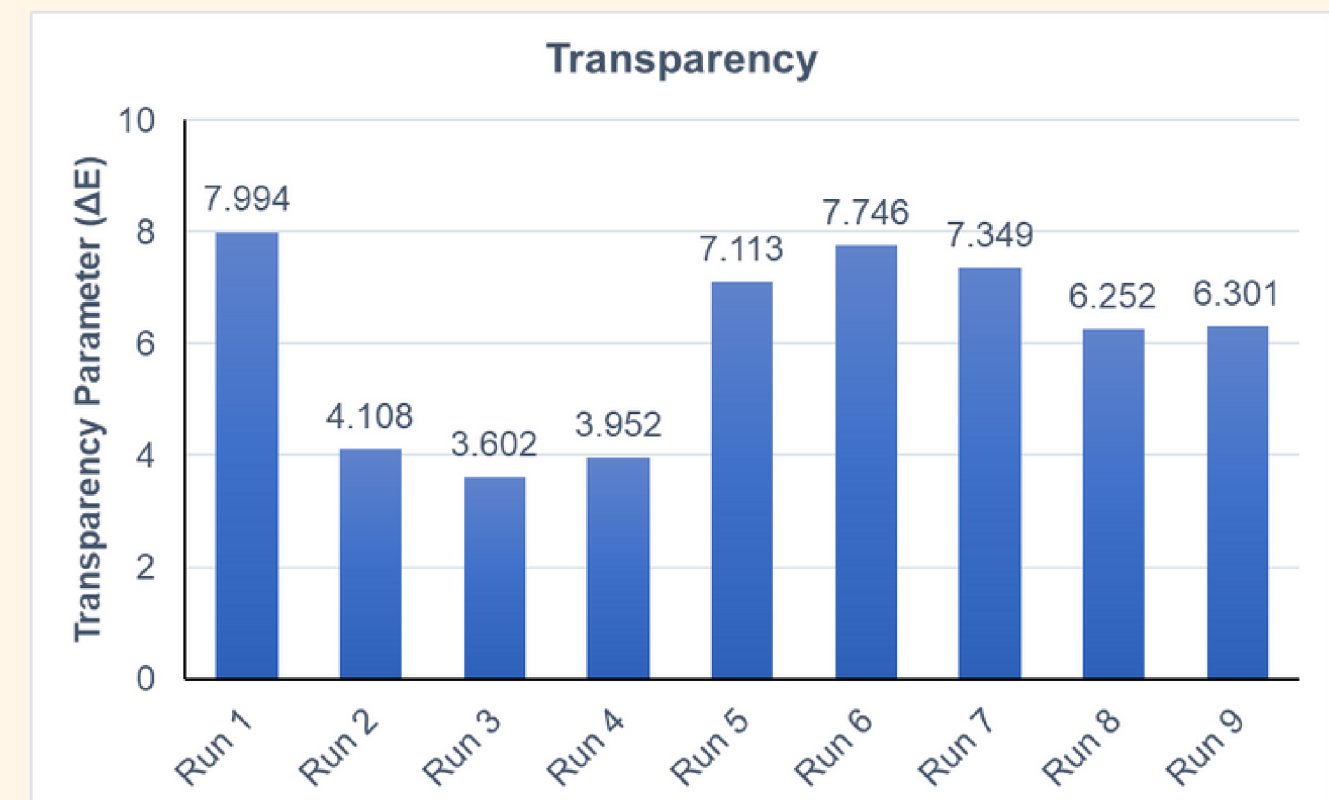

# RESULTS & DISCUSSION

## WVTR

Compared to control pectin films the WVTR has slightly increased at a range of 80 g/m<sup>2</sup>/h. This could be attributed to the presence of hydrophilic sodium alginate and sorbitol plasticizer.

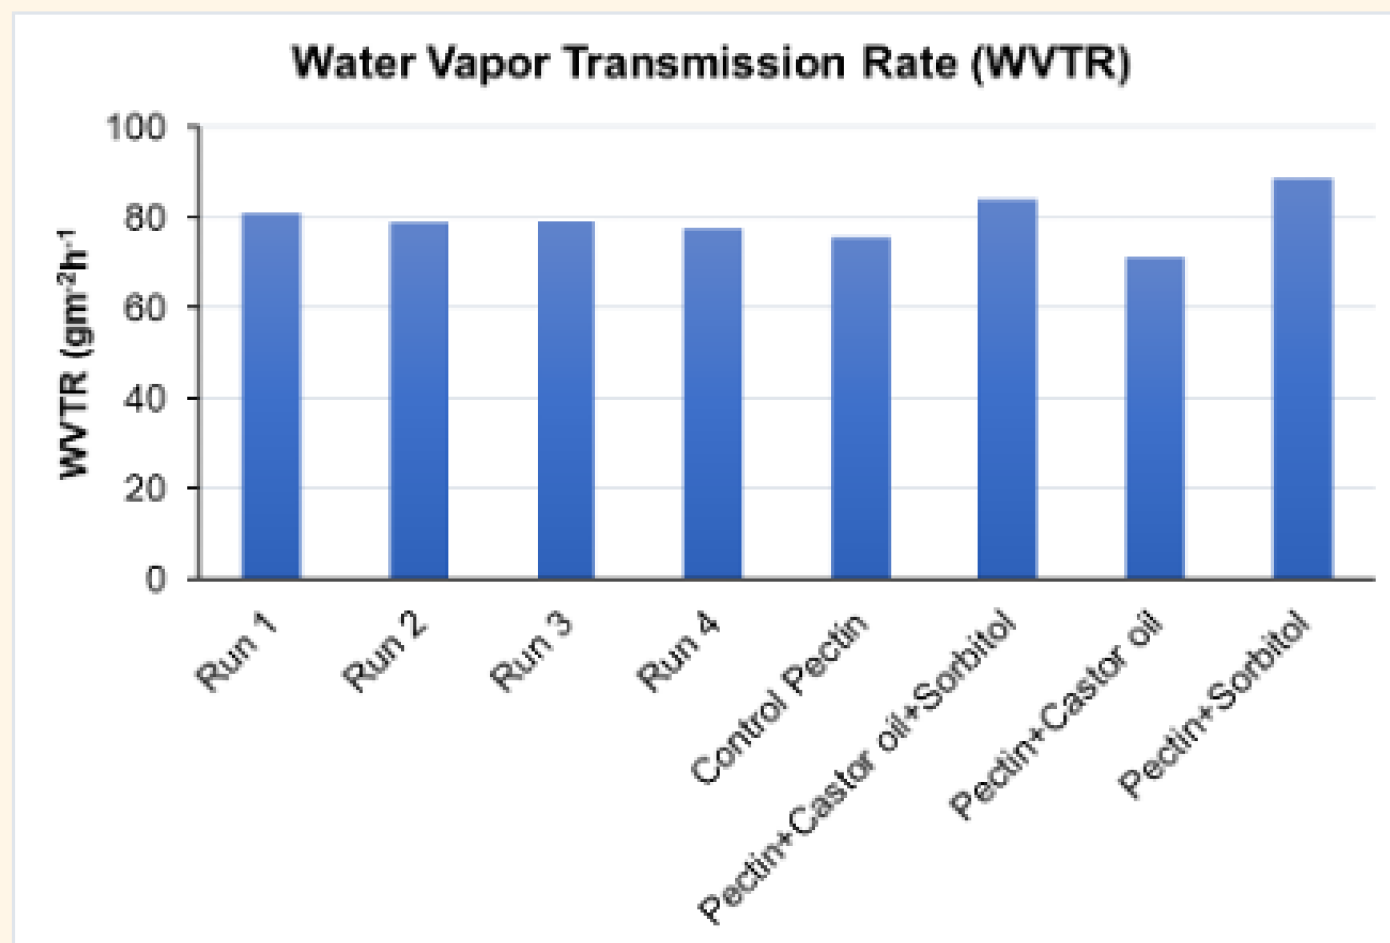

## Water Contact Angle

The Water Contact Angle of Run 1 and Run 2 are 42.45° and 54.18°, shown below, which is less than that of control pectin (67.92°). Therefore, it is evident that the hydrophilic plasticizer sorbitol has in a way reduced the surface hydrophobicity of pectin films.

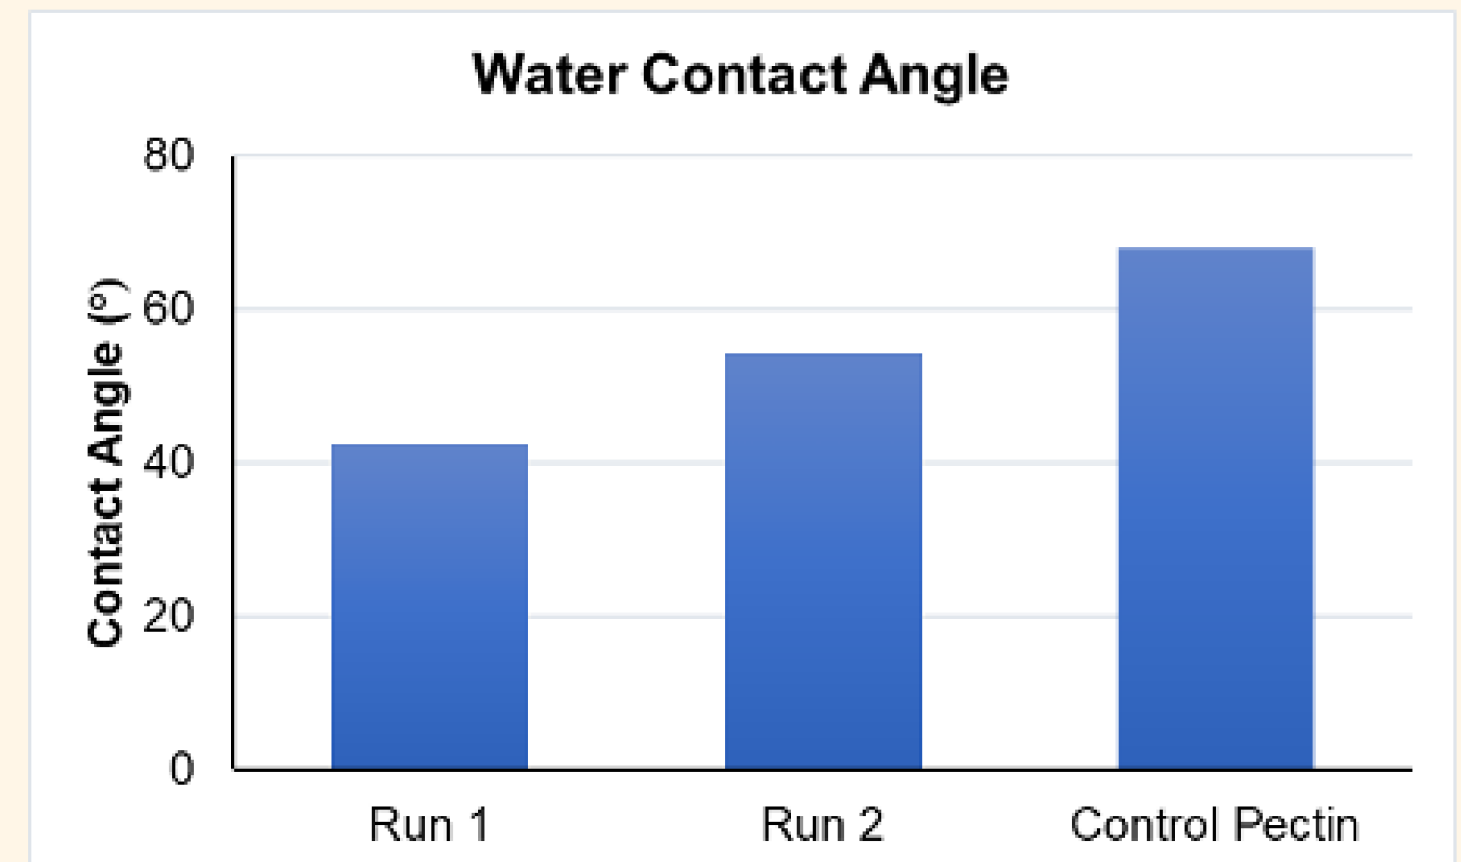

# RESULTS & DISCUSSION

## Mechanical Properties

- Tensile strength, load at break, and percent strain at break are compared.
- The mechanical properties suggest that the low concentration of sodium alginate and castor oil and a high concentration of sorbitol has improved the flexibility and strength of the films.
- This is apparent from the improved elongation at break for Run 2 and Run 3 than Run 1.
- As per the figure shown below, Run 4 is the optimum concentration in terms of acceptable mechanical properties.

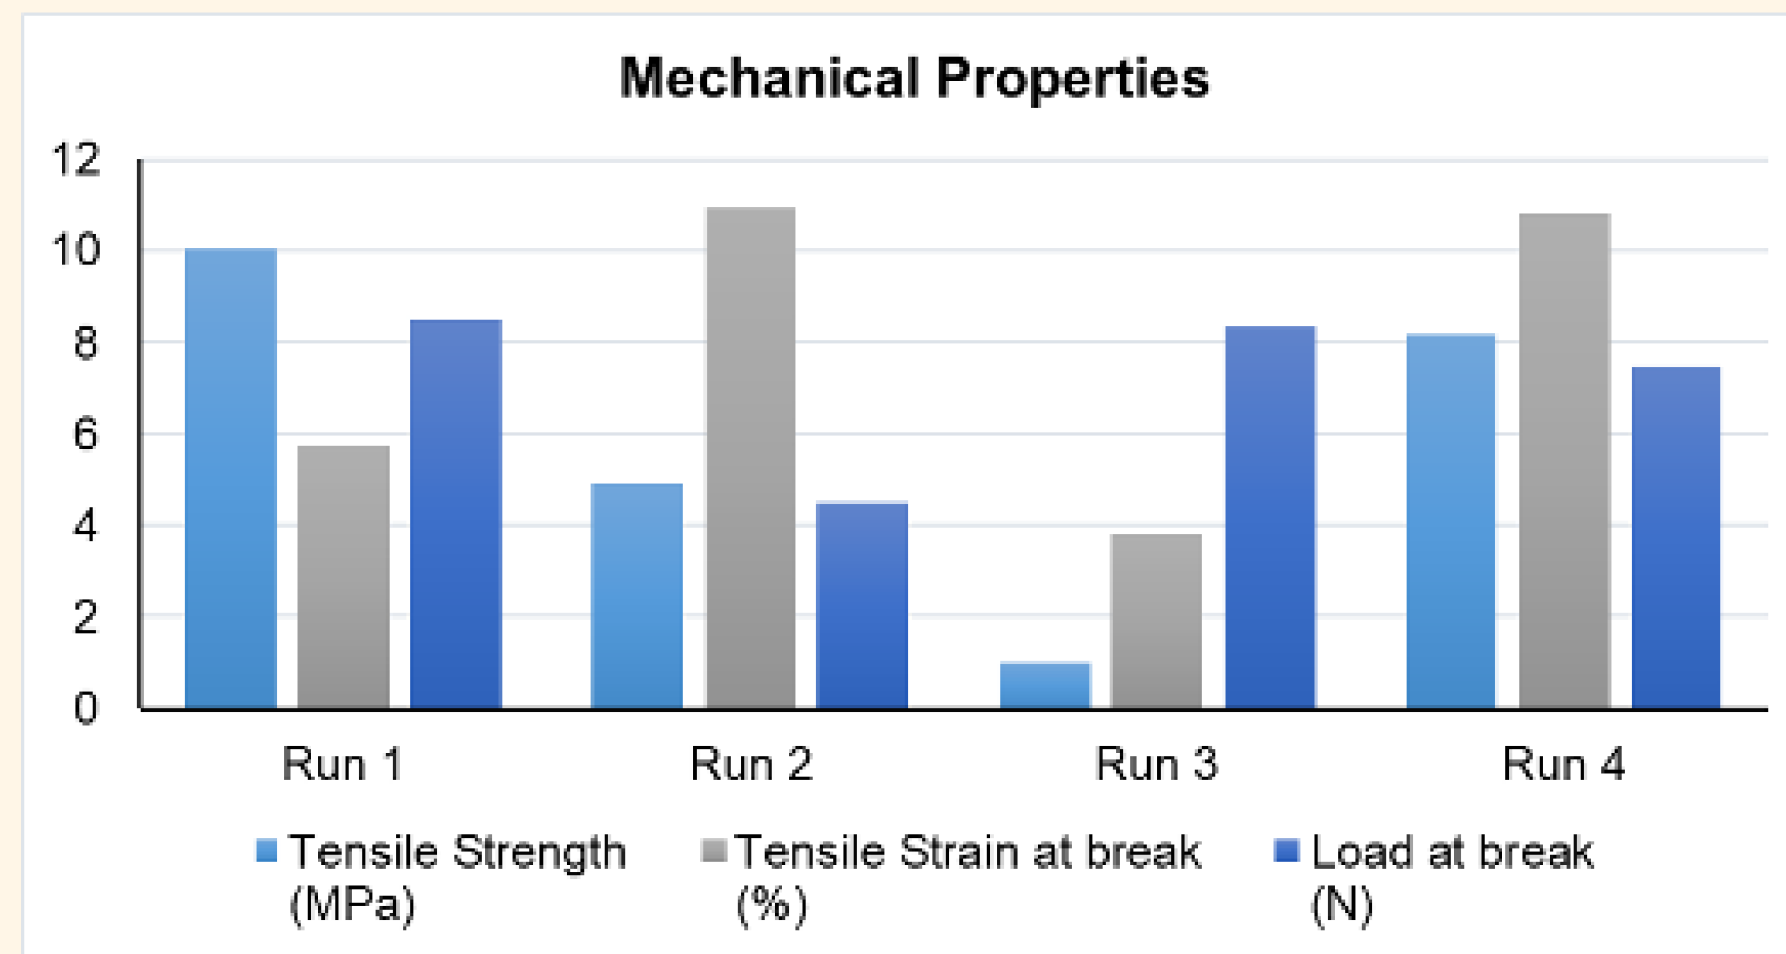

# RESULTS & DISCUSSION

## Fourier Transform Infrared Spectroscopy (FTIR)

- There are no new chemical bonds formed in the film preparation process and the film is an outcome of a pure physical process.
- Peaks at  $3300\text{ cm}^{-1}$  are linked to the O-H stretching vibrations of the hydroxyl groups in pectin.
- Peaks at  $1650\text{ cm}^{-1}$  are related to the C=O stretching vibration of the carbonyl group in pectin.
- Peaks at  $2920\text{ cm}^{-1}$  and  $2850\text{ cm}^{-1}$  were caused by the castor oil's aliphatic chains' C-H stretching vibrations.

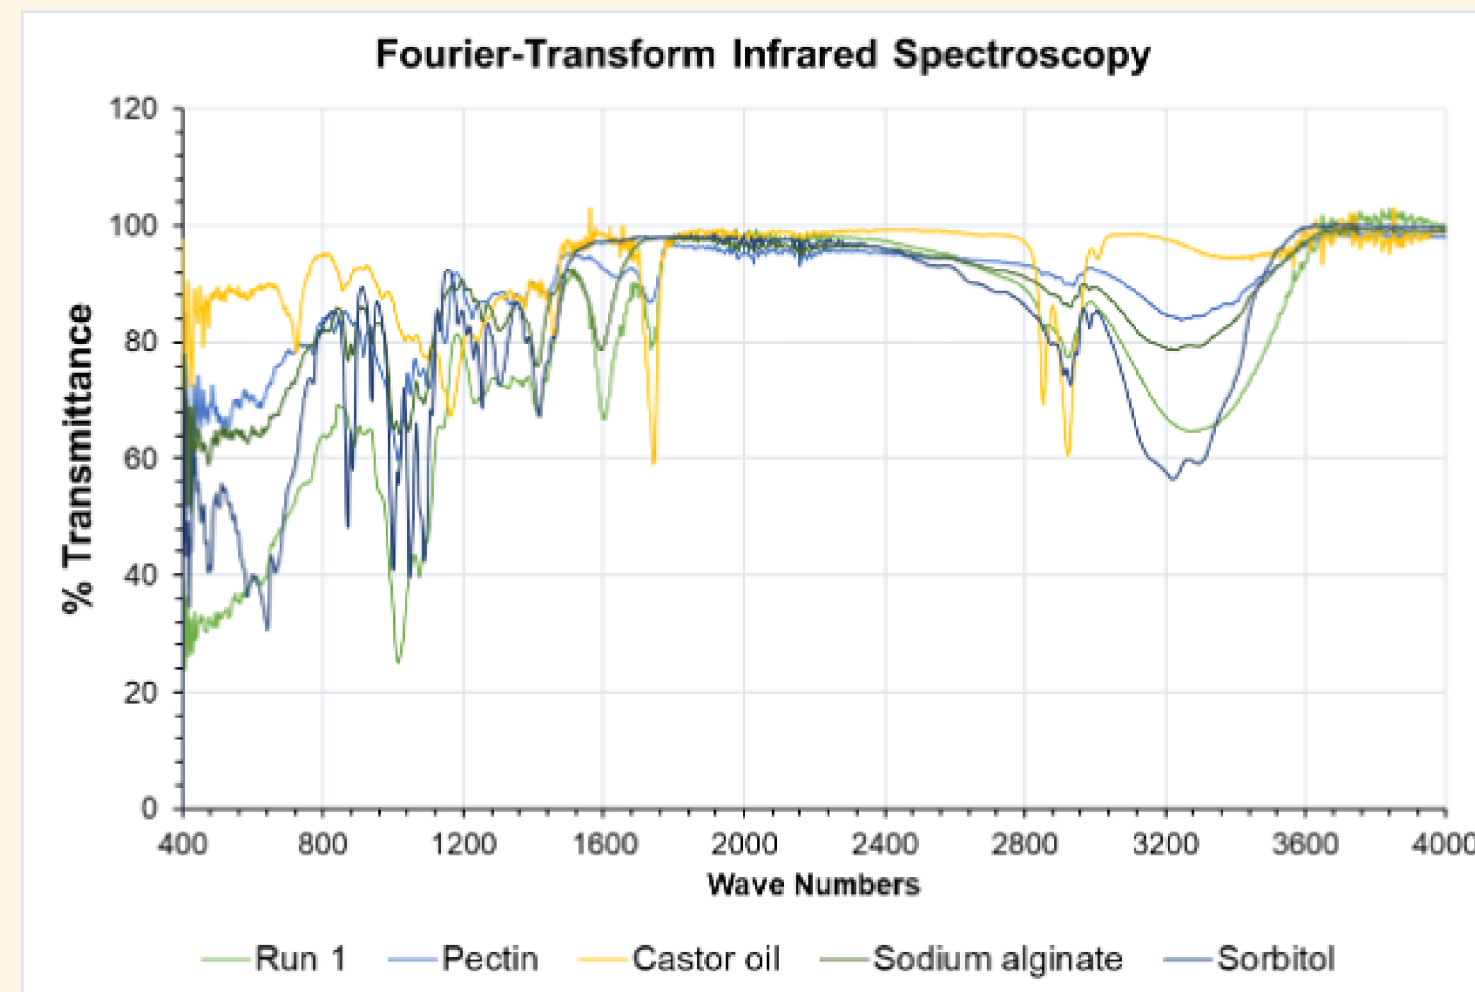

# RESULTS & DISCUSSION

## Shelf Life Test

Food products coated with the film forming solution proved to have lasted longer than the ones left undisturbed. Thus, proving that the films extend the shelf life of food products

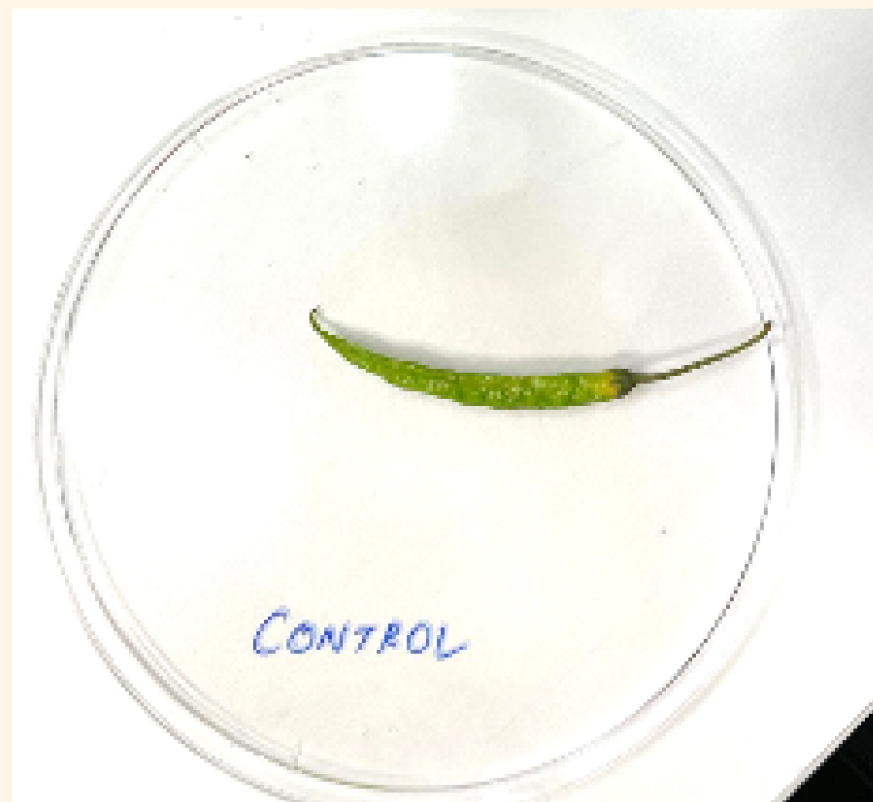

(a)

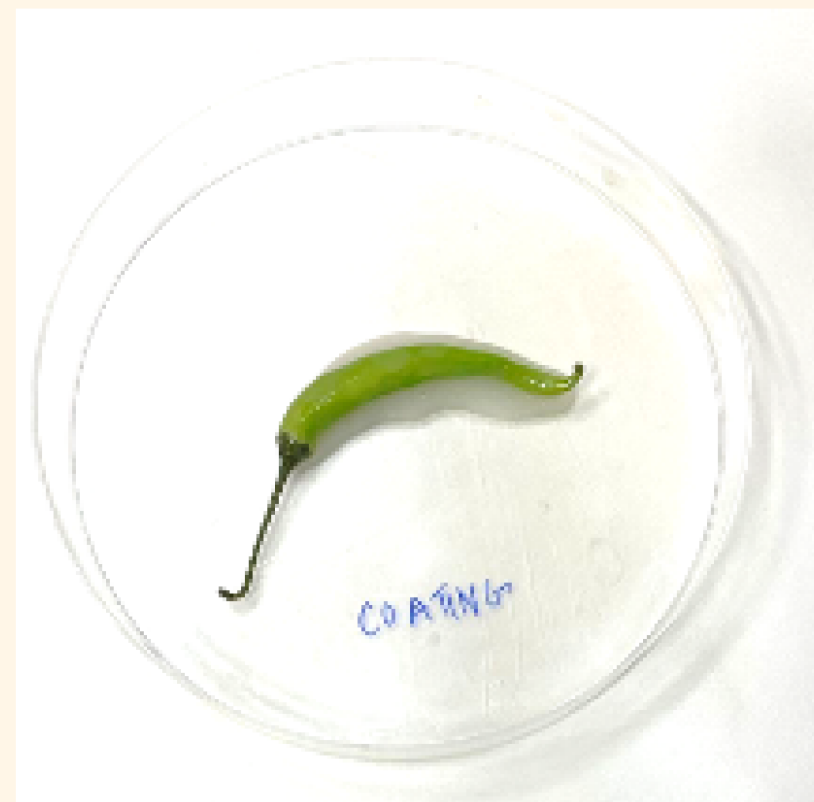

(b)

(a) Control Chili kept to compare with the coated one wrinkled; (b) Chili coated with film forming solution stayed fresh

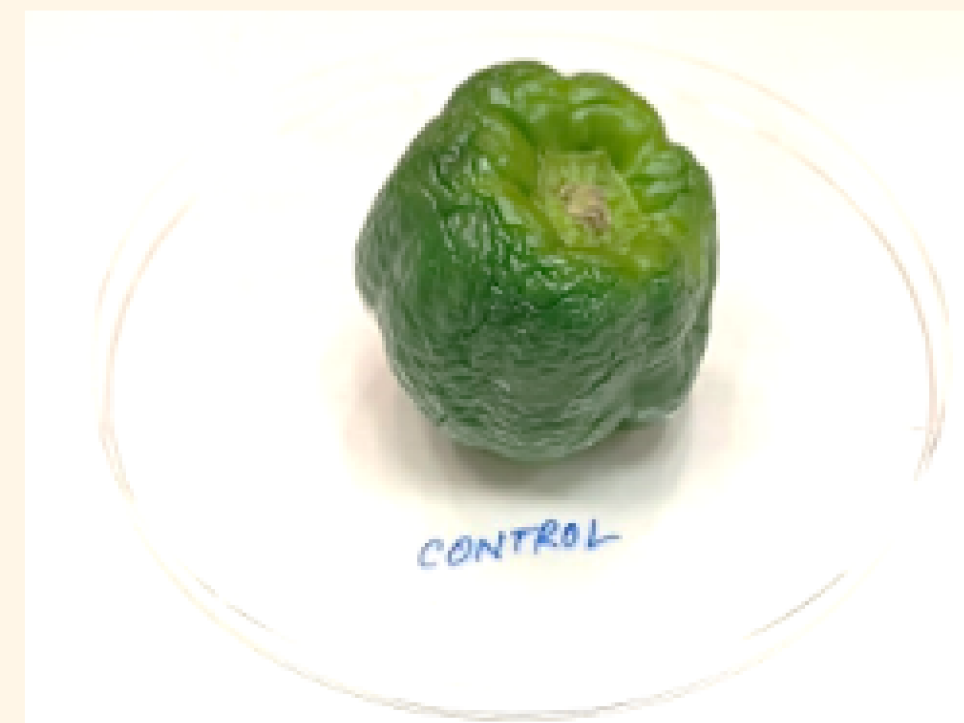

(a)

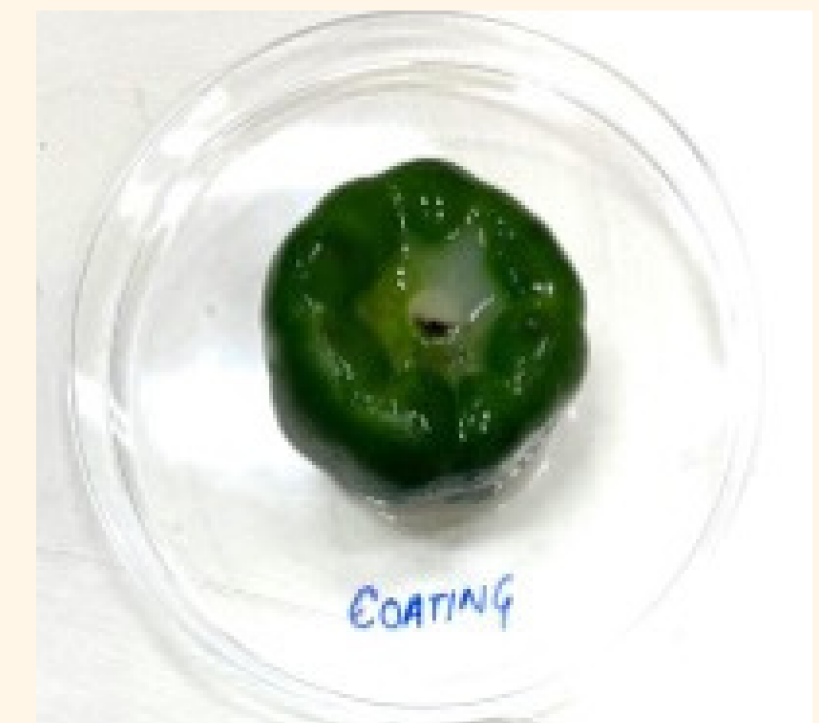

(b)

(a) Control Capsicum kept to compare with the coated one wrinkled; (b) Capsicum coated with film forming solution stayed fresh.



# CONCLUSIONS

- The polysaccharide-polymer films were successfully developed with sodium alginate range between 25%-50% w/w, Castor oil 10%-15% w/w and D-Sorbitol 15%-30% w/w.
- All films and control films were thin, flexible and transparent.
- Films based on design of experiments compared to the control films showed:
  - (1) Improved barrier properties
  - (2) Improved mechanical properties - tensile strength and load at break
  - (3) Improved hydrophobic properties
  - (4) Improved shelf life on food products
- FTIR Analysis provides information that no new chemical interactions were formed as compared to the pure components. This shows a purely physical process.
- These biodegradable composite films proved to be environment friendly as compared to synthetic polymer based films.

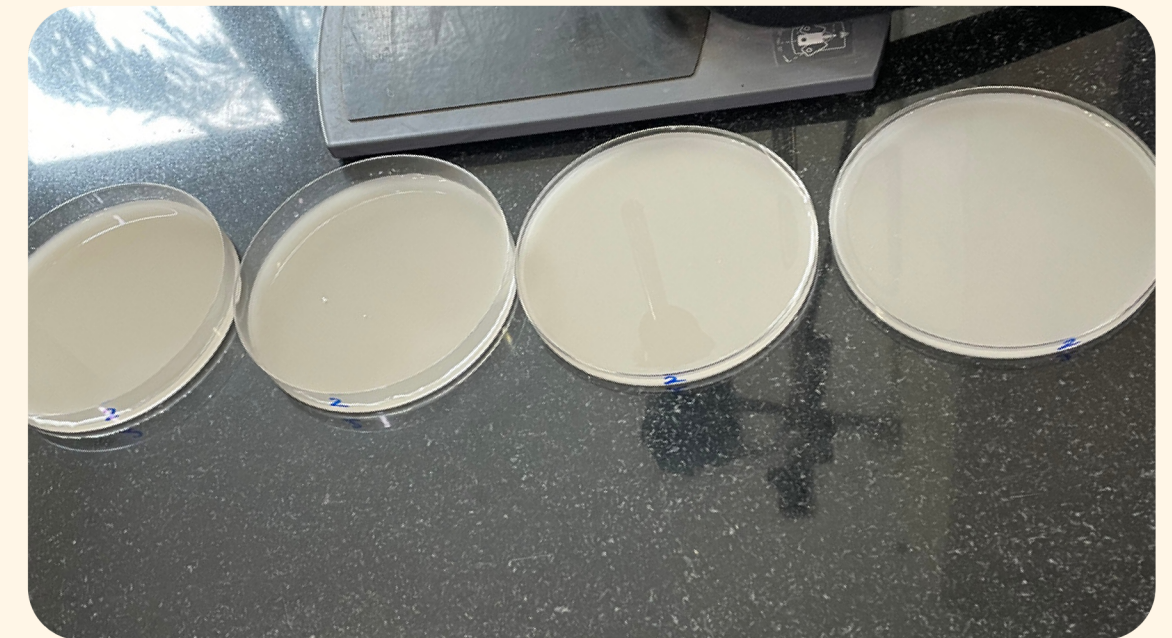

# REFERENCES



- Statista. (2023, April 3). Global market value of food packaging from 2022-2028. <https://www.statista.com/statistics/876489/food-packaging-market-value-forecast-worldwide/>
- Mehraj S, Sistla YS. Optimization of process conditions for the development of pectin and glycerol based edible films: statistical design of experiments. *Electron J Biotechnol* 2022;55. <https://doi.org/10.1016/j.ejbt.2021.11.004>
- Mohnen D. Pectin structure and biosynthesis. *Current Opinion in Plant Biology*. 2008;11(3):266-277
- Honeycutt, L. (2019, September 13). List of Foods High in Pectin. [LIVESTRONG.COM](https://www.livestrong.com/article/289067-list-of-foods-high-in-pectin/). <https://www.livestrong.com/article/289067-list-of-foods-high-in-pectin/>
- Min B, Bae IY, Lee HG, Yoo SH, Lee S. Utilization of pectin-enriched materials from apple pomace as a fat replacer in a model food system. *Bioresource Technology*. 2010;101(14):5414-5418
- Ciriminna R, Chavarria-Hernandez N, Hernandez AIR, Pagliaro M. Pectin: A new perspective from the biorefinery standpoint. *Biofuels, Bioproducts and Biorefining*. 2015;9(4):368-377
- Peng Q, Xu Q, Yin H, Huang L, Du Y. Characterization of an immunologically active pectin from the fruits of *lycium ruthenicum*. *International Journal of Biological Macromolecules*. 2014;64:69-75
- Dranca F, Oroian M. Extraction, purification and characterization of pectin from alternative sources with potential technological applications. *Food Research International*. 2018;113:327-350
- Mellinas, C.; Ramos, M.; Jiménez, A.; Garrigós, M.C. Recent Trends in the Use of Pectin from Agro-Waste Residues as a Natural-Based Biopolymer for Food Packaging Applications. *Materials* 2020, 13, 673. <https://doi.org/10.3390/ma13030673>



# THANK YOU

DEVELOPMENT OF PECTIN AND SODIUM ALGINATE COMPOSITE FILMS  
WITH IMPROVED BARRIER AND MECHANICAL PROPERTIES FOR FOOD  
PACKAGING APPLICATIONS

---

**AUTHORS:** ABHAY KANNAN, M DHEEPHTHA, YAMINI SUDHA SISTLA
